# Supplementary material for: Alternative strategies for closing the award gap between white and minority ethnic students
Source: eLife. 2021 Aug 4;10:e58971. doi: 10.7554/eLife.58971 (PMC8337073; doi:10.7554/eLife.58971)
Supplement: Figure 1—source data 1. [file elife-58971-fig1-data1.xlsx]

## Sheet: Figure 1
Figure 1 numerical values
Entrance Qualifications are Near Identical for BAME and White Students in this Study
Students with A level admission exams who entered with cohort 1 (2013 entry), cohort 2 (2014 entry) and cohort 3 (2015 entry)
of the year 1-2 pathway.
Figure 1A Top 3 Admission Grades to Individual Students: Mean Tariff				Number	BAME	White
3-year mean +/- SEM	BAME	White		total A level grades	246	290
	50.53+/- 0.15	50.29+/- 0.33		total students with A levels	82	97
Figure 1B Distribution of Total Number of Admission Grades to Cohort
3-year mean +/- SEM
grade awarded (percentage of all grades)	BAME	White
A*	36.13 +/- 0.83	33.58+/- 4.39
A	59.32 +/- 0.27	61.44 +/- 4.69
B	4.55 +/- 1.01	4.98 +/- 0.62
C or lower	0	0
Figure 1C: Comparison of Admission and Representative Cell Biology Course (year 2) Grades, Same Students
3-year mean +/- SEM	BAME	White
total number of A or A* awarded across the cohort (percentage of all grades)	95.45 +/- 1.01	95.02 +/- 0.61
total number of 1st or 2i awarded across the cohort (percentage of all students)	67.91 +/- 3.74	75.91 +/- 3.79
mean of all individual marks awarded (percentage)	62.81 +/- 0.41	67.89 +/- 0.53

## Sheet: individual cohorts
Individual cohort values for the means reported in Figure 1
Entrance Qualifications are Near Identical for BAME and White Students in this Study
Students with A level admission exams who entered with cohort 1 (2013 entry), cohort 2 (2014 entry) and cohort 3 (2015 entry)
of the year 1-2 pathway. Note, all data in Figure 1 is only for students who enter with 'A' levels. Data in all other figures is for all students who were admitted.							Cohort by year of entry
				Total Number	3-cohort Total		2013		2014		2015
Figure 1A Top 3 Admission Grades to Individual Students: Mean Tariff					BAME	White	BAME	White	BAME	White	BAME	White
	BAME	White		A level grades	246	290	75	96	87	117	84	77
3-year mean +/- SEM	50.53+/- 0.15	50.29+/- 0.33		students with A levels	82	97	25	32	29	39	28	26
2013 mean +/- SEM	50.24 +/- 0.70	49.50 +/- 0.39
2014 mean +/- SEM	50.48 +/- 0.58	50.87 +/- 0.50
2015 mean +/- SEM	50.86 +/- 0.54	50.51 +/- 0.65
Figure 1B Distribution of Total Number of Admission Grades to Cohort			Cohort by year of entry
grade awarded (percentage of all grades)	3-year mean +/- SEM		2013		2014		2015
	BAME	White	BAME	White	BAME	White	BAME	White
A*	36.13 +/- 0.83	33.58+/- 4.39	34.67	22.92	35.63	40.17	38.1	37.66
A	59.32 +/- 0.27	61.44 +/- 4.69	58.67	72.92	59.77	55.56	59.52	55.84
B	4.55 +/- 1.01	4.98 +/- 0.62	6.67	4.17	4.6	4.27	2.38	6.49
C or lower	0	0	0	0	0	0	0	0
			Cohort by year of entry (year took year-2 cell biology in brackets)
Figure 1C: Comparison of Admission and Representative Cell Biology Course (year 2) Grades, Same Students admitted with 'A' levels			2013 (2014)		2014 (2015)		2015 (2016)
3-year mean +/- SEM	BAME	White	BAME	White	BAME	White	BAME	White
total number of A or A* awarded across the cohort (percentage of grades)	95.45 +/- 1.01	95.02 +/- 0.62	93.33	95.83	95.4	95.73	97.62	93.51
total number of 1st or 2i awarded across the cohort (percentage of students)	67.91 +/- 3.74	75.91 +/- 3.79	60	68.75	75.86	74.36	67.86	84.62
mean of all individual marks awarded (percentage)	62.81 +/- 0.41	67.89 +/- 0.53	62.04	68.47	63.76	66.59	62.64	68.62
			See next sheet for: level of 1st-class only; analysis of individual cohort results;
			and comparison of students admitted with A levels and all students who were admitted

## Sheet: A levels v All admissions
Students admitted with A levels and all students admitted (i.e. those with A levels or other entrance exams) to the Year 1-2 cell biology pathway perform similarly
is referred in Entrance qualifications for cell biology students in this study
Percentage of students awarded 1st or 2i and 1st only for the final module mark in Year 2 cell biology as indicated
Students who entered with cohort 1 (2013 entry), cohort 2 (2014 entry) and cohort 3 (2015 entry)
For completeness cohort 4 (entered 2016) is also included
Cohort	Entered UCL	Took Year 2 Cell Biology		Student Count	3-cohort		4-cohort		Cohort
1	2013	2014			(chts. 1-3)		(chts. 1-4)		1		2		3		4
2	2014	2015			BAME	White	BAME	White	BAME	White	BAME	White	BAME	White	BAME	White
3	2015	2016		Admitted with A levels	82	97	not available from UCL		25	32	29	39	28	26	no data	no data
4	2016	2017		All admissions	116	134	167	177	39	44	36	48	41	42	51	43
Students admitted with 'A' levels (same students reported in Figure 1)			Cohort
	3-year mean +/- SEM (cohorts 1-3)		1		2		3		4
	BAME	White	BAME	White	BAME	White	BAME	White	BAME	White
percentage of students awarded 1st or 2i - final module mark	67.91 +/- 3.74	75.91 +/- 3.79	60	68.75	75.86	74.36	67.86	84.62	data not available from UCL
percentage of students awarded 1st - final module mark	26.68 +/- 1.79	49.34 +/- 3.40	24	53.13	31.03	41.03	25	53.85	data not available from UCL
All students in cohorts 1-3 (i.e. students reported in Figure 1 plus all other students admitted)			Cohort
	3-year mean +/- SEM (cohorts 1-3)		1		2		3		4
	BAME	White	BAME	White	BAME	White	BAME	White	BAME	White
percentage of students awarded 1st or 2i - final module mark	71.54 +/- 0.97	79.33 +/- 2.66	69.23	77.27	72.22	75	73.17	85.71	76.47	88.37
percentage of students awarded 1st - final module mark	31.10 +/- 2.15	45.00 +/- 3.48	35.9	52.27	30.56	37.5	26.83	45.24	35.29	37.21
All students in the year 1-2 pathway (cohorts 1-4)
	4-year mean +/- SEM (cohorts 1-4)
percentage of students awarded 1st or 2i - final module mark	72.77 +/- 1.29	81.59 +/- 2.8
percentage of students awarded 1st - final module mark	32.15 +/- 1.85	43.06 +/- 3.11
Analysis of raw data	Fraction of cohorts where proportionally more white than BAME students awarded grade indicated
	Cohorts 1-3	Cohorts 1-3	Cohorts 1-4	Cohorts 1-4
Type of admission exam	A level	All	A level	All
Proportion awarded 1st or 2i grades	2 out of 3	3 out of 3	not available	4 out of 4
Proportion awarded 1sts	3 out of 3	3 out of 3	not available	4 out of 4
