# Supplementary material for: Alternative strategies for closing the award gap between white and minority ethnic students
Source: eLife. 2021 Aug 4;10:e58971. doi: 10.7554/eLife.58971 (PMC8337073; doi:10.7554/eLife.58971)
Supplement: Figure 2—source data 1. [file elife-58971-fig2-data1.xlsx]

## Sheet: Figure 2A-D
Figure 2A-D numerical values									Number of students for each course component reported in Figure 2 (A-F). Any small differences in student count between different components for the same cohort or between year 1 and year 2 were carefully identified and explained in the main paper and reflect the expected behaviour of students, as for any course of study and degree progression. Individual cohorts are described in Table 1.
The exam is the main contributor to the award gap in cell biology
All students, all individual cohorts
NB, data fields of BAME and White are ordered White, BAME for clearest visualisation on the graphs
Percentage of students awarded good marks (1st or 2i)									Year 1 cell biology N=	Final Mark		Exam		Coursework
Figure 2A: Final Mark				Figure 2C: Coursework and Exam						BAME	white	BAME	white	BAME	white
Year 1-2 pathway	White	BAME		White-CW	BAME-CW	White-Exam	BAME-Exam		Cohort 1	41	43	41	43	41	43
Year 1 Cht. 1	93.02	82.93		97.67	92.68	90.7	73.17		Cohort 2	32	47	32	47	32	47
Year 1 Cht. 2	91.49	84.38		97.87	96.88	80.85	65.63		Cohort 3	42	41	42	41	42	41
Year 1 Cht. 3	85.37	80.95		87.8	88.1	78.05	69.05		Cohort 4	48	42	48	42	48	42
Year 1 Cht. 4	90.48	79.17		97.62	95.83	76.19	64.58		Total	163	173	163	173	163	173
Year 2 Cht. 1	77.27	69.23		100	97.44	55.81	38.46
Year 2 Cht. 2	75	72.22		97.92	91.67	45.83	30.56
Year 2 Cht. 3	85.71	73.17		97.62	100	52.5	30		Year 2 cell biology N=	Final Mark		Exam		Coursework
Year 2 Cht. 4	88.37	76.47		97.67	100	39.53	41.18			BAME	white	BAME	white	BAME	white
									Cohort 1	39	44	39	43	39	44
Figure 2B: Final Mark				Figure 2D: Coursework and Exam					Cohort 2	36	48	36	48	36	48
year 3 study	White	BAME		White-CW	BAME-CW	White-Exam	BAME-Exam		Cohort 3	41	42	40	40	41	42
Course A	84.16	75.9		86	80.12	76.67	59.49		Cohort 4	51	43	51	43	51	43
Course B	89.58	82.86		89.58	88.57	85.71	71.88		Total	167	177	166	174	167	177
Course C	85	68.52		83.33	77.78	82.14	65.54
Course D	82.35	63.64		91.18	81.8	78.78	59.4
									Year 3 cell biology N=	Final Mark		Exam		Coursework
										BAME	white	BAME	white	BAME	white
									Course A	83	101	79	90	83	100
									Course B	35	48	32	42	35	48
									Course C	54	60	52	56	54	60
									Course D	33	34	32	33	33	34
									Total	205	243	195	221	205	242

## Sheet: Figure 2E, F
Figure 2E and F numerical values
Average award Gap in Good Grades
Note, Average award Gap is the difference between the mean proportion of good grades awarded to white and BAME students: means are shown on next sheet "mean and SEM"
All students, all cohorts
Figure 2E, Cell Biology Award Gaps
Final Mark for the Course			Exam			CW
Year 1	Year 2	Year 3	Year 1	Year 2	Year 3	Year 1	Year 2	Year 3
8.23	8.82	12.54	13.34	13.37	16.75	1.87	1.02	5.45
Figure 2F, UCL Award Gaps
Final Mark for the Year
Year 1	Year 2	Year 3
7.21	11.04	9.31

## Sheet: mean and SEM
Mean proportion of good grades awarded to BAME and white students
All students, all cohorts
Mean year 1, mean year 2 and mean year 3 cell biology of individual cohorts that are shown on sheet 1 (Figure 2A-D)
Cell Biology								Cell Biology Student Count
4-Cohort Mean (year 1, year 2) or 4-course mean (year 3)	Final Mark		Exam		CW			N=	Final Mark	Final Mark	Exam	Exam	CW	CW
	BAME	White	BAME	White	BAME	White			BAME	White	BAME	White	BAME	White
Year 1	81.86	90.09	68.11	81.45	93.37	95.24		Year 1	163	173	163	173	163	173
Year 2	72.77	81.59	35.05	48.42	97.28	98.3		Year 2	167	177	166	174	167	177
Year 3	72.73	85.27	64.08	80.83	82.07	87.52		Year 3	205	243	195	221	205	242
SEM	Final Mark		Exam		CW			Small differences in student count are expected; see full details in the main paper.
	BAME	White	BAME	White	BAME	White
Year 1	0.99	1.44	1.68	2.8	1.71	2.15
Year 2	1.29	2.8	2.44	3.13	1.7	0.49
Year 3	3.65	1.33	2.57	1.71	2.01	1.53
UCL									UCL Student Count
3-Cohort Mean	Final Mark for the Year								N=	Final Mark for the Year	Final Mark for the Year
Year of Study	BAME	White	Cohorts (academic year, of the year of study indicated)							BAME	White
Year 1	69.13	76.34	2016, 17, 18						Year 1	9406	8024
Year 2	68.4	79.44	2016, 17, 18						Year 2	8051	6785
Year 3	79.23	88.54	2016, 17, 18						Year 3	6738	5722
SEM	Final Mark for the Year
Year of Study	BAME	White
Year 1	0.57	0.34
Year 2	1.63	1.1
Year 3	0.36	0.6

## Sheet: compare size of award gaps
Comparison of size of average award gaps at level of all good marks in the year 1, year 2 and year 3 cell biology courses
is referred in Dissecting cell biology components at the level of good grades and in Evaluating potential underlying causes of the award gap in exams
Average award-gaps as per previous sheet "Figure 2E, F"
The number of times larger the exam award- gap relative to the coursework gap is determined by dividing the exam gap by the coursework gap.
Cell biology		Average award gap			Number of times larger the exam-award gap
course		for component indicated			is relative to the coursework gap
Year 1		Exam	13.34
Year 1		Coursework	1.87		7.13
Year 2		Exam	13.37
Year 2		Coursework	1.02		13.11
Year 3		Exam	16.75
Year 3		Coursework	5.45		3.07

## Sheet: Cohen's d
Cohen's d, is referred in Dissecting cell biology components at the level of good grades
All students, all cohorts
Final Mark			Exam			CW
Year 1	Year 2	Year 3	Year 1	Year 2	Year 3	Year 1	Year 2	Year 3
3.4	2.16	2.52	2.98	2.4	3.91	0.49	0.46	1.54
