# Supplementary material for: Alternative strategies for closing the award gap between white and minority ethnic students
Source: eLife. 2021 Aug 4;10:e58971. doi: 10.7554/eLife.58971 (PMC8337073; doi:10.7554/eLife.58971)
Supplement: Figure 3—figure supplement 1—source data 1. [file elife-58971-fig3-figsupp1-data1.xlsx]

## Sheet: Fig3-S1 A, B Yrs2, 3 award gaps
Figure 3 - Supplement Figure 1 A-B numerical valuees									Number of students for each course component reported in Figure 3A-F and Figure 3 - Figure supplement 1A-F and factors to calculate the normalised frequencies for each mark interval to enable direct, fair comparison of BAME and White students in Figure 3A-F. Any small differences in total student count between different components for the same cohort are as described in Figure 2 – Table supplemen…
The award gap for first class marks is similar to the difference in good marks awarded for coursework in cell biology
Average award gaps at level of 1st class marks-only and all good marks, year 2 and year 3 cell biology courses
Note, Average award gap is the difference between the average percentage of white and BAME students that received the indicated grade band: averages are shown on sheet 'averages for panels A, B'
For fair comparison, year 2 includes cohorts 1, 2, 3 and excludes cohort 4 as reported and explained in the main paper									Year 2 cell biology N=	Final Mark		Exam		Coursework
Please find data for all four year-2 cohorts (and compared to cohorts 1, 2, 3) on the sheet, titled 'yr2 chts (1-3 and 1-4) averages'.										BAME	white	BAME	white	BAME	white
Year 3 includes all four courses									Cohort 1	39	44	39	43	39	44
									Cohort 2	36	48	36	48	36	48
Figure 3 - Supplement Figure 1A, level of 1st class marks only									Cohort 3	41	42	40	40	41	42
Year 2			Year 3						Total	116	134	115	131	116	134
Final Mark for the Course	Exam	CW	Final Mark for the Course	Exam	CW
13.8	5.6	2.6	6.45	9.29	4.11				Normalisation factor, as fraction	134/116	134/134	131/115	131/131	134/116	134/134
									As decimal	1.15517	1	1.13913	1	1.15517	1
Figure 3 - Supplement Figure 1B, level of all good marks
Year 2			Year 3						Year 3 cell biology N=	Final Mark		Exam		Coursework
Final Mark for the Course	Exam	CW	Final Mark for the Course	Exam	CW					BAME	white	BAME	white	BAME	white
7.79	18.37	2.14	12.54	16.75	5.45				Course A	83	101	79	90	83	100
									Course B	35	48	32	42	35	48
									Course C	54	60	52	56	54	60
									Course D	33	34	32	33	33	34
									Total	205	243	195	221	205	242
									Normalisation factor, as fraction	243/205	243/243	221/195	221/221	242/205	242/242
									As decimal	1.18537	1	1.13333	1	1.18049	1

## Sheet: Fig3-S1 C, D Yr.3 award gaps
Figure 3- figure supplement 1 C, D numerical values and individual underlying year 3 data											Number of students for each course component reported in Figure 3 - S1 (A-D). Any small differences in student count between different components for the same cohort were carefully identified and explained in the main paper and reflect the expected behaviour of students, as for any course of study and degree progression. Individual cohorts are described in Table 1.
The award gap for first class marks is similar to the difference in good marks awarded for coursework in cell biology
All students, all individual courses
1st class grades	Final mark for the course			Exam mark			Coursework mark
year 3 study	Percentage of students			Percentage of students			Percentage of students
	awarded 1st class		Award gap panel C	awarded 1st class		Award gap panel C	awarded 1st class		Award gap panel C		Year 3 cell biology N=	Final Mark		Exam		Coursework
Course	White	BAME		White	BAME		White	BAME				BAME	white	BAME	white	BAME	white
Course A	25.74	25.3	0.44	25.56	20.25	5.31	49.5	43.37	6.13		Course A	83	101	79	90	83	100
Course B	25	20	5	16.67	9.38	7.29	31.25	28.57	2.68		Course B	35	48	32	42	35	48
Course C	28.33	16.67	11.66	26.79	17.31	9.48	33.33	27.78	5.55		Course C	54	60	52	56	54	60
Course D	14.71	6.06	8.65	18.18	3.1	15.08	29.41	27.3	2.11		Course D	33	34	32	33	33	34
											Total	205	243	195	221	205	242
1st or 2i grades	Final mark for the course			Exam mark			Coursework mark
year 3 study	Percentage of students			Percentage of students			Percentage of students
	awarded 1st or 2i class		Award gap panel D	awarded 1st or 2i class		Award gap panel D	awarded 1st or 2i class		Award gap panel D
Course	White	BAME		White	BAME		White	BAME
Course A	84.16	75.9	8.26	76.67	59.49	17.18	86	80.12	5.88
Course B	89.58	82.86	6.72	85.71	71.88	13.83	89.58	88.57	1.01
Course C	85	68.52	16.48	82.14	65.54	16.6	83.33	77.78	5.55
Course D	82.35	63.64	18.71	78.78	59.4	19.38	91.18	81.8	9.38

## Sheet: averages for panels A, B
Average percentage of indicated grade awarded to BAME and white students, from which the award-gaps reported on the first sheet are calculated															Number of students for each course component reported in Figure 3 - S1 (A-F). Any small differences in student count between different components for the same cohort were carefully identified and explained in the main paper and reflect the expected behaviour of students, as for any course of study and degree progression. Individual cohorts are described in Table 1.
Calculations for Year 2:										Calculations for Year 3:
At level of all good marks: Mean and SEM of cohorts 1, 2, 3 (cht. 4 excluded, as noted on previous sheet).										All data: Mean and SEM of all four year 3, courses: A, B, C, D
At level of 1st class marks: Average of aggregate of year 2 cohorts 1, 2, 3
Cohort aggregate was calculated as noted, for reasons explained and reported in the main text and Methods
															Year 2 cell biology N=	Final Mark		Exam		Coursework
Please see next sheet for complete sets of year 2 data, all four cohorts (chts. 1, 2, 3, 4) and comparing 3- and 4-cohort data sets																BAME	white	BAME	white	BAME	white
															Cohort 1	39	44	39	43	39	44
															Cohort 2	36	48	36	48	36	48
Aggregate number of students and average percentage awarded this level															Cohort 3	41	42	40	40	41	42
1st class:	Final Mark			Coursework and Exam											Total	116	134	115	131	116	134
Year 2	White	BAME		White-CW	BAME-CW	White-Exam	BAME-Exam
students chts.1-3	60	36		127	107	21	12								Year 3 cell biology N=	Final Mark		Exam		Coursework
total students	134	116		134	116	131	115									BAME	white	BAME	white	BAME	white
average percentage	44.8	31		94.8	92.2	16	10.4								Course A	83	101	79	90	83	100
															Course B	35	48	32	42	35	48
All other tables: Percentage and mean percentage of students awarded grades indicated (1st-only or 1st or 2i)															Course C	54	60	52	56	54	60
															Course D	33	34	32	33	33	34
1st or 2i	Final Mark			Coursework and Exam											Total	205	243	195	221	205	242
Year 2	White	BAME		White-CW	BAME-CW	White-Exam	BAME-Exam
Year 2 Cht. 1	77.27	69.23		100	97.44	55.81	38.46
Year 2 Cht. 2	75	72.22		97.92	91.67	45.83	30.56
Year 2 Cht. 3	85.71	73.17		97.62	100	52.5	30
mean	79.33	71.54		98.51	96.37	51.38	33.01
SEM	2.66	0.97		0.61	2.01	2.4	2.23
1st class: Final Mark				Coursework and Exam
year 3 study	White	BAME		White-CW	BAME-CW	White-Exam	BAME-Exam
Course A	25.74	25.3		49.5	43.37	25.56	20.25
Course B	25	20		31.25	28.57	16.67	9.38
Course C	28.33	16.67		33.33	27.78	26.79	17.31
Course D	14.71	6.06		29.41	27.3	18.18	3.1
mean	23.45	17		35.87	31.76	21.8	12.51
SEM	2.6	3.51		3.99	3.36	2.21	3.37
1st or 2i: Final Mark				Coursework and Exam
year 3 study	White	BAME		White-CW	BAME-CW	White-Exam	BAME-Exam
Course A	84.16	75.9		86	80.12	76.67	59.49
Course B	89.58	82.86		89.58	88.57	85.71	71.88
Course C	85	68.52		83.33	77.78	82.14	65.54
Course D	82.35	63.64		91.18	81.8	78.78	59.4
mean	85.27	72.73		87.52	82.07	80.83	64.08
SEM	1.33	3.65		1.53	2.01	1.71	2.57

## Sheet: Yr2 chts (1-4 and 1-3) averages
Three- and four-cohort, average percentage of indicated grade awarded to BAME and white students in year 2 cell biology													Number of students for each course component year 2 cohorts. Any small differences in student count between different components for the same cohort were carefully identified and explained in the main paper and reflect the expected behaviour of students, as for any course of study and degree progression. Individual cohorts are described in Table 1.
is referred in Figure 3 - figure supplement 1-figure legend
Calculations:
At level of all good marks: Mean and SEM of cohorts 1, 2, 3 and mean and SEM of cohorts 1, 2, 3, 4
At level of 1st class marks: Average of aggregate of cohorts 1, 2, 3 and average of aggregate of cohorts 1, 2, 3, 4
Average of cohort aggregate was calculated as noted, for reasons explained and reported in the main text, Methods and Figure 3-S1, legend
													Year 2 cell biology N=	Final Mark		Exam		Coursework
Note:														BAME	white	BAME	white	BAME	white
The averages are similar for the same component and grade level comparing cohorts 1-3 and 1-4													Cohort 1	39	44	39	43	39	44
The exam four-cohort average is slightly lower for white, and higher for BAME students compared to the three-cohort average, as expected from the data:													Cohort 2	36	48	36	48	36	48
	and reported for example in Figure 2C; no exam gap in year 2-cohort 4.												Cohort 3	41	42	40	40	41	42
													Total chts. 1-3	116	134	115	131	116	134
Aggregate number of students and average percentage awarded 1st class marks
1st class: Final Mark				Coursework and Exam									Cohort 4	48	42	48	42	48	42
Year 2	White	BAME		White-CW	BAME-CW	White-Exam	BAME-Exam						Total chts. 1-4	167	177	166	174	167	177
students chts.1-3	60	36		127	107	21	12
total students chts. 1-3	134	116		134	116	131	115
average chts. 1-3	44.8	31		94.8	92.2	16	10.4
students chts. 1-4	76	54		167	157	26	19
total students chts. 1-4	177	167		177	167	174	166
average chts. 1-4	42.9	32.3		94.4	94	14.9	11.4
Percentage and mean percentage of students awarded 1st or 2i
1st or 2i: Final Mark				Coursework and Exam
Year 2	White	BAME		White-CW	BAME-CW	White-Exam	BAME-Exam
Year 2 Cht. 1	77.27	69.23		100	97.44	55.81	38.46
Year 2 Cht. 2	75	72.22		97.92	91.67	45.83	30.56
Year 2 Cht. 3	85.71	73.17		97.62	100	52.5	30
Year 2 Cht. 4	88.37	76.47		97.67	100	39.53	41.18
mean chts. 1-3	79.33	71.54		98.51	96.37	51.38	33.01
SEM	2.66	0.97		0.61	2.01	2.4	2.23
mean chts. 1-4	81.59	72.77		98.3	97.28	48.42	35.05
SEM	2.8	1.29		0.49	1.7	3.13	2.44

## Sheet: compare award gap sizes ALL
Comparison of size of average award gaps at level of 1st class-only and all good marks in the (year 1 - see note), year 2 and year 3 cell biology courses
is referred in: Cell biology award gaps in first class marks; Evaluating potential underlying causes of the award gap in exams; Limitations
For convenience, the year 1 data is included from Figure 2 -source data 1
Average award-gap method of calculations and values as per previous sheets: "averages for gaps panels A, B" and "Yr2 chts (1-4 and 1-3) averages"
The number of times one component award-gap is larger than another was determined by dividing the first named award-gap by the second, of the pair indicated.
Exam and coursework award-gaps in 1st class grades
Cell biology		Average award gap			Number of times larger the exam-award gap
course		for component indicated			is relative to the coursework gap
Year 1: chts 1-4		Exam	see limitations for preliminary data
Year 1: chts 1-4		Coursework	see limitations for preliminary data
Year 2: chts 1-3		Exam	5.6
Year 2: chts 1-3		Coursework	2.6		2.15
Year 2: chts 1-4		Exam	3.5
Year 2: chts 1-4		Coursework	0.4		8.75
Year 3		Exam	9.29
Year 3		Coursework	4.11		2.26
Exam and coursework award-gaps in 1st or 2i grades
Cell biology		Average award gap			Number of times larger the exam-award gap
course		for component indicated			is relative to the coursework gap
Year 1: chts 1-4		Exam	13.34
Year 1: chts 1-4		Coursework	1.87		7.13
Year 2: chts 1-3		Exam	18.37
Year 2: chts 1-3		Coursework	2.14		8.58
Year 2: chts 1-4		Exam	13.37
Year 2: chts 1-4		Coursework	1.02		13.11
Year 3		Exam	16.75
Year 3		Coursework	5.45		3.07
Final course award-gap		Level of class indicated
Cell biology		Average award gap			Number of times larger the final course gap in first class marks
course		for component indicated			relative to all good marks for the year of course indicated
Year 1: chts 1-4		Final - 1st class:	no data: see limitations
Year 1: chts 1-4		Final - 1st or 2i	8.23		not applicable
Year 2: chts 1-3		Final - 1st class	13.8
Year 2: chts 1-3		Final - 1st or 2i	7.79		1.77
Year 2: chts 1-4		Final - 1st class	10.6
Year 2: chts 1-4		Final - 1st or 2i	8.82		1.2
Year 3		Final - 1st class	6.45
Year 3		Final - 1st or 2i	12.54		0.51
