# Supplementary material for: Alternative strategies for closing the award gap between white and minority ethnic students
Source: eLife. 2021 Aug 4;10:e58971. doi: 10.7554/eLife.58971 (PMC8337073; doi:10.7554/eLife.58971)
Supplement: Figure 4—source data 1. [file elife-58971-fig4-data1.xlsx]

## Sheet: number and percentage
Figure 4
Summary of previous recommendations on how to close the award gap between white and BAME undergraduate students
	Raw Value	Figure 4
Category of Recommendation	Number	Percentage
Determine or Monitor Award-Gap Size	17	8.63
Provide Infrastructure, Leadership or Training	94	47.72
Address Student Experience or Sense of Belonging	26	13.2
Change Teaching + Learning Practice or Curriculum	23	11.68
Engage Students in Seeking Solutions	12	6.09
Communicate or Share What Works	6	3.05
Conduct Further Research on the Causes	12	6.09
Other	7	3.55
Total	197	100
